# Supplementary material
Source: PubMed Central journal article supplement (PMC1725807)
Supplement: emermedj_19_2_136__1.pdf [file emermedj_19_2_136__1.pdf]

## Appendix 1 – sample questionnaire

Access to the child protection register  
– a survey of UK Accident and Emergency Departments

1. How do you currently access the child protection register?

- a. Contact the duty social worker. \_\_\_\_\_
- b. Hard copy of register available in A&E. \_\_\_\_\_
- c. Computerised copy of register available in A&E. \_\_\_\_\_
- d. Other \_\_\_\_\_

If other, please specify \_\_\_\_\_  
\_\_\_\_\_

2. Do you find this arrangement satisfactory? Yes \_\_\_\_\_

No \_\_\_\_\_

If no, please state why \_\_\_\_\_  
\_\_\_\_\_

3. What are your criteria for checking patients against the child protection register?

- a. All patients routinely checked \_\_\_\_\_
- b. Patients with specified risk factors \_\_\_\_\_
- c. Other \_\_\_\_\_

If other, please specify \_\_\_\_\_  
\_\_\_\_\_
